# Supplementary material
Source: PubMed Central journal article supplement (PMC5505729)
Supplement: NIHMS873397-supplement-Supporting_Information.pdf [file NIHMS873397-supplement-Supporting_Information.pdf]

## SUPPLEMENTAL FIGURES AND TABLES

### Biosynthesis and regulation of sulfomenaquinone, a metabolite associated with virulence in *Mycobacterium tuberculosis*\*

Kimberly M. Sogi<sup>1,#</sup>, Cynthia M. Holsclaw<sup>3,4</sup>, Gabriela K. Fragiadakis<sup>1,‡</sup>, Daniel K. Nomura<sup>5</sup>, Julie A. Leary<sup>4</sup>, Carolyn R. Bertozzi<sup>1,2</sup>

<sup>1</sup>Department of Chemistry and <sup>2</sup>Howard Hughes Medical Institute, Stanford University, 380 Roth Way MC: 5080 Stanford, CA, 94305, USA. <sup>3</sup>Campus Mass Spectrometry Facilities, 9 Hutchison Hall, One Shields Avenue, Davis, CA, 95616, USA. <sup>4</sup>Department of Molecular and Cellular Biology, University of California, Davis, 130 Briggs Hall, Davis, CA, 95616, USA. <sup>5</sup>Department of Nutritional Science and Toxicology, University of California, Berkeley, 127 Morgan Hall, Berkeley, CA, 94720, USA.

Present address: # School of Public Health, University of California, Berkeley, 188 Li Ka Shing, Berkeley, CA, 94720 USA. ‡Department of Microbiology and Immunology, Stanford School of Medicine, Stanford University, 318 Campus Drive, Stanford, CA, 94305, USA.

To whom correspondence should be addressed: Carolyn R. Bertozzi, Department of Chemistry, Stanford University, 380 Roth Way MC 5080, Stanford, CA, 94305.

Email: [bertozzi@stanford.edu](mailto:bertozzi@stanford.edu)

## TABLE OF CONTENTS

|                                                                                                                                                                                        |            |
|----------------------------------------------------------------------------------------------------------------------------------------------------------------------------------------|------------|
| <b>Figure S1:</b> Mass spectra of TLE from <i>M. smegmatis</i> strains expressing SMK biosynthetic genes showing region m/z 880-886.                                                   | <b>S2</b>  |
| <b>Figure S2:</b> DNA gel of <i>cyp128</i> deletion.                                                                                                                                   | <b>S3</b>  |
| <b>Figure S3:</b> (A) TLC of 35S-labeled SMK mutants; (B) <i>in vitro</i> growth curve of $\Delta$ <i>cyp128</i> and complement.                                                       | <b>S3</b>  |
| <b>Figure S4:</b> Mass spectra from TLE of <i>M. tuberculosis</i> WT and SMK deletion mutants with region m/z 880-886 shown.                                                           | <b>S4</b>  |
| <b>Figure S5:</b> Scheme depicting promoters for <i>cyp128</i> .                                                                                                                       | <b>S5</b>  |
| <b>Figure S6:</b> Mass spectra of TLE from $\Delta$ <i>cyp128</i> complementation strains with <i>cyp128</i> under control of three different promoters with region m/z 880-886 shown. | <b>S5</b>  |
| <b>Figure S7:</b> Structure of MK-9.                                                                                                                                                   | <b>S6</b>  |
| <b>Figure S8:</b> Schematic of <i>M. tuberculosis</i> electron transport chain and the inhibitors screened against WT <i>M. tuberculosis</i> and SMK mutants.                          | <b>S6</b>  |
| <b>Table S1:</b> MIC90 values for WT, SMK mutants and complements.                                                                                                                     | <b>S6</b>  |
| <b>Table S2:</b> Strains used in this study                                                                                                                                            | <b>S7</b>  |
| <b>Table S3:</b> Plasmids used in this study                                                                                                                                           | <b>S8</b>  |
| <b>Table S4:</b> Primers used in this study                                                                                                                                            | <b>S9</b>  |
| <b>References</b>                                                                                                                                                                      | <b>S10</b> |

**FIGURE S1:** Mass spectra of TLE from *M. smegmatis* strains expressing SMK biosynthetic genes showing region m/z 880-886.

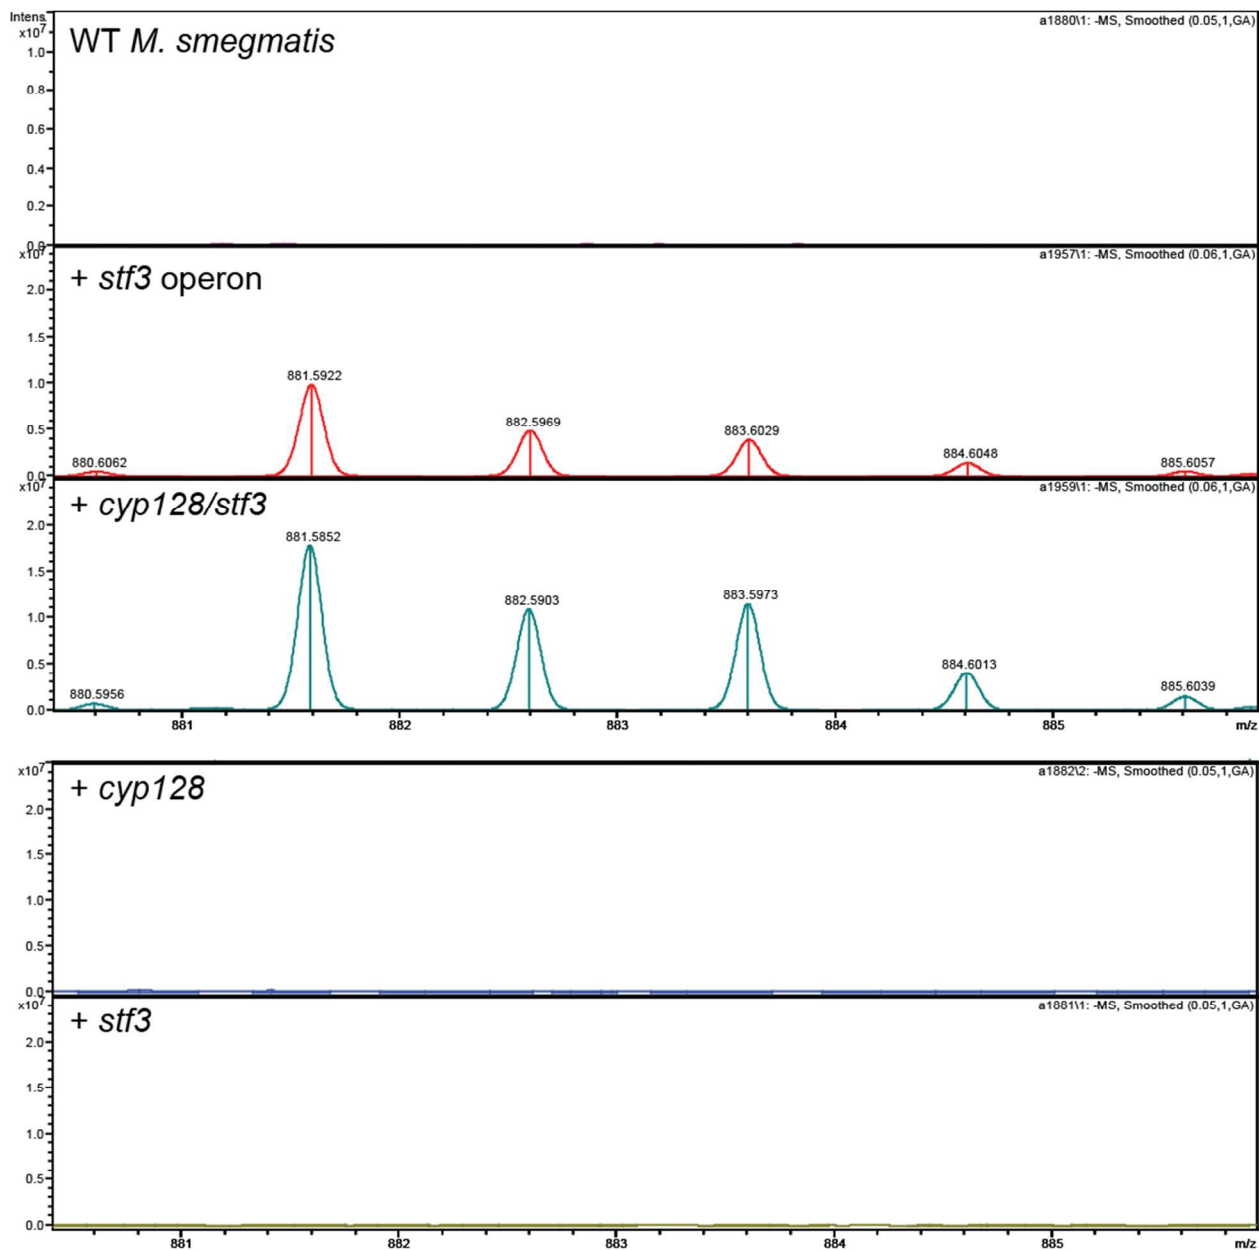

**FIGURE S2:** DNA gel from WT *M. tuberculosis* and  $\Delta cyp128$  using primers for either *cyp128* or hygromycin.

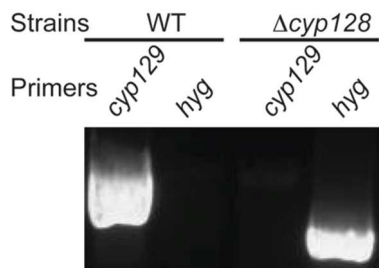

**FIGURE S3:** A) TLC analysis of TLE from *M. tuberculosis* strains grown on  $^{35}\text{S}$ -sulfate: (I) WT, (II)  $\Delta cyp128$ , (III)  $\Delta cyp128::cyp128$ , (IV)  $\Delta stf3$ , (V)  $\Delta stf3::stf3$ . Arrow indicates spot corresponding to SMK. B) Growth of  $\Delta cyp128$  and complement compared to WT in 7H9 liquid media.

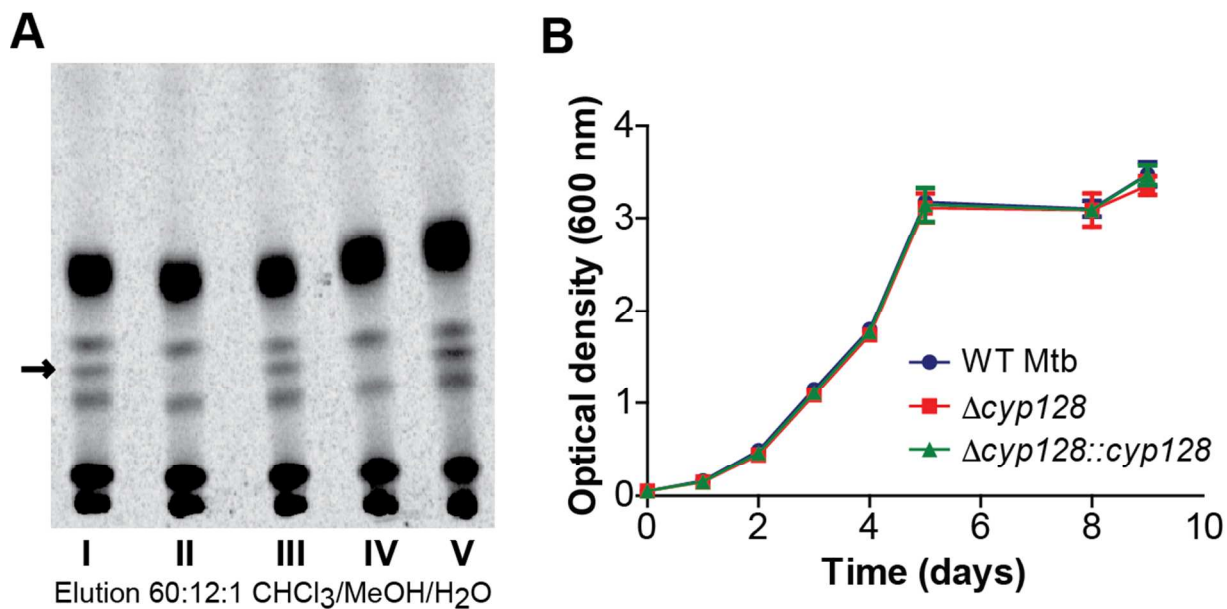

**FIGURE S4:** Mass spectra from TLE of *M. tuberculosis* WT and SMK deletion mutants with region m/z 880-886 shown.

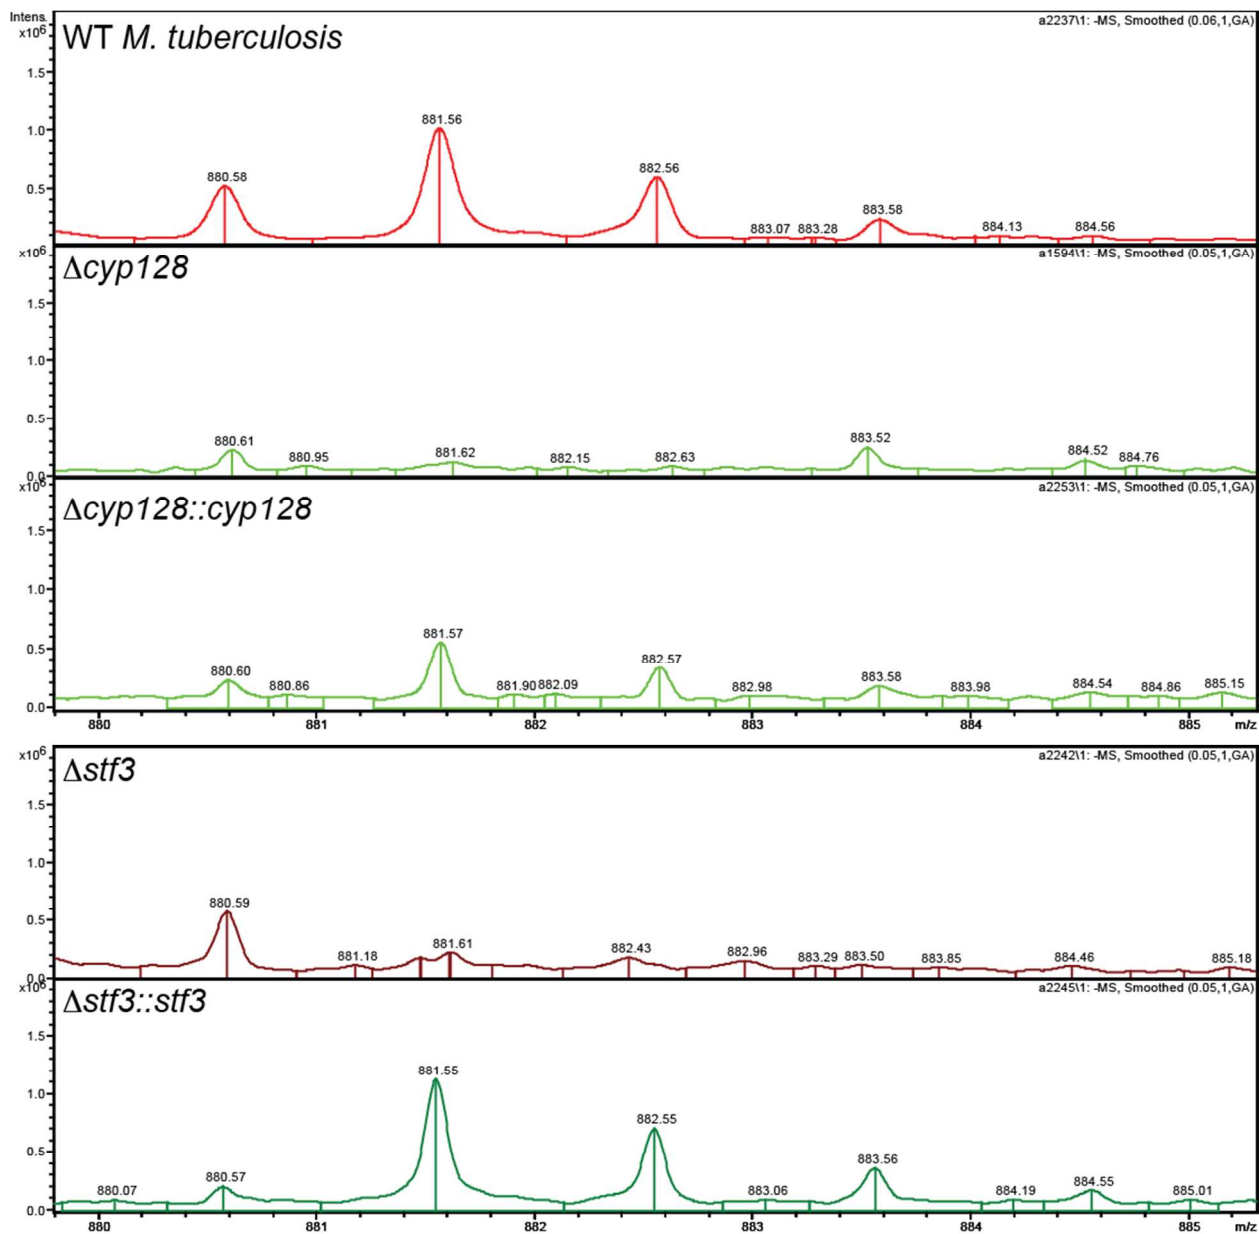

**FIGURE S5:** Scheme depicting promoters for *cyp128*.

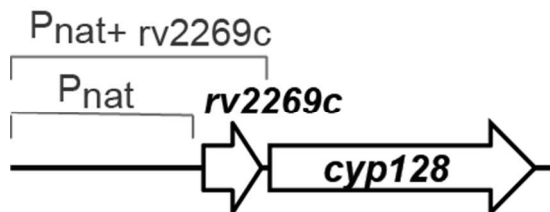

**FIGURE S6:** Mass spectra of TLE from  $\Delta cyp128$  complementation strains with *cyp128* under control of three different promoters with region *m/z* 880-886 shown.

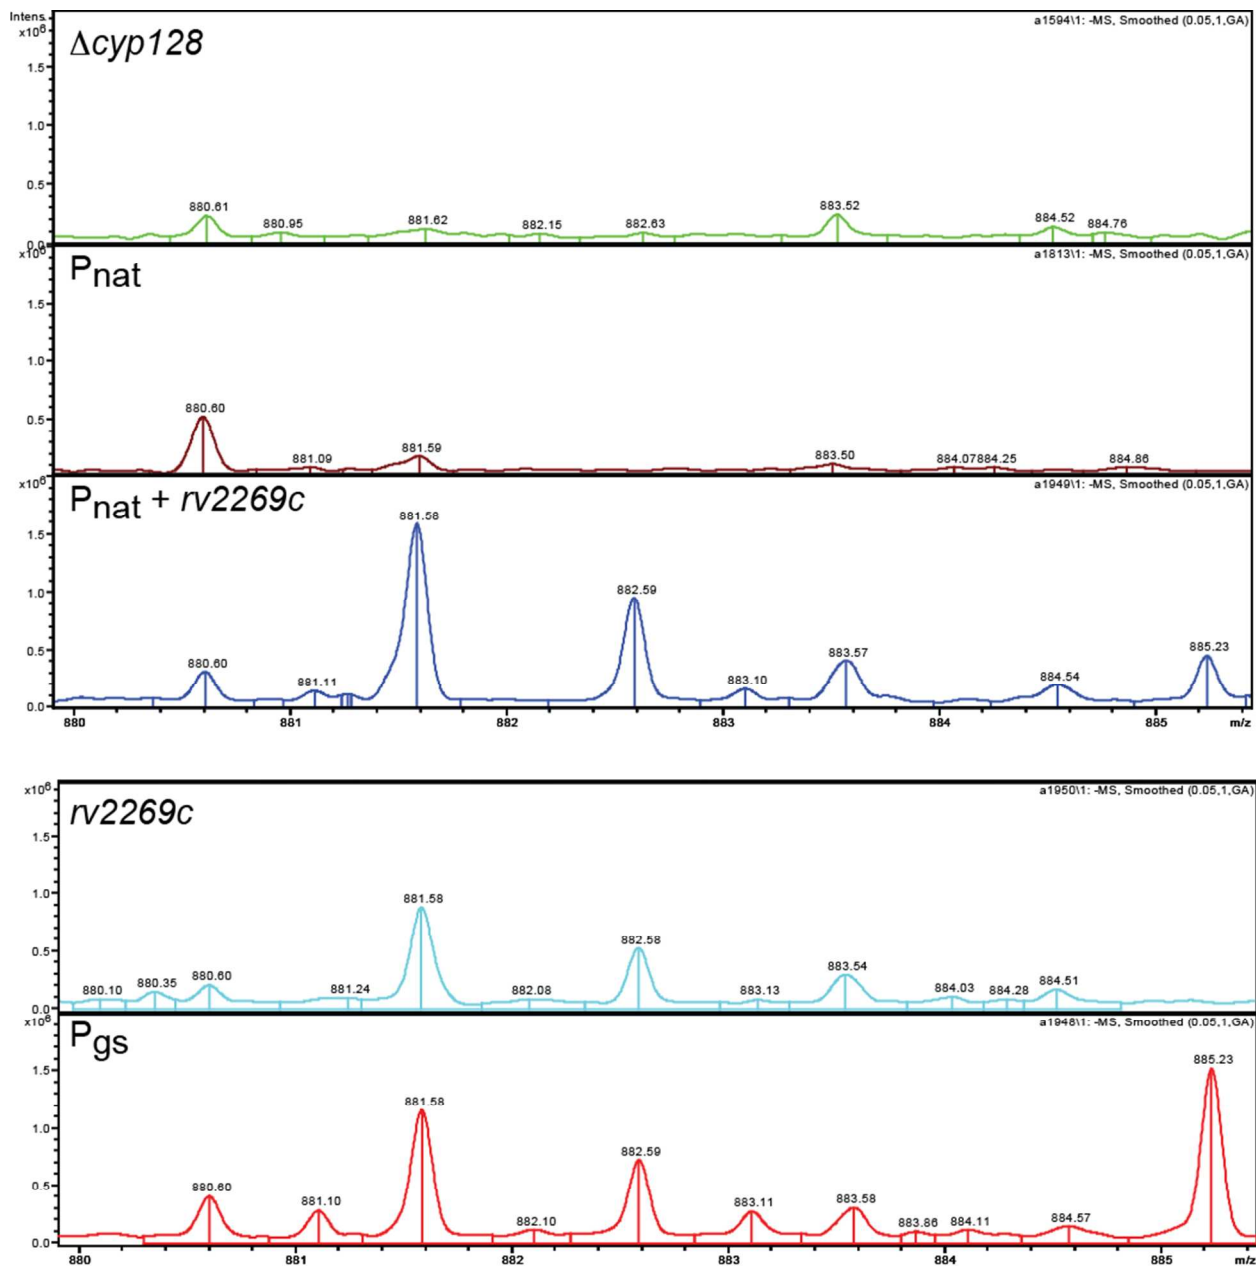

**FIGURE S7:** Structure of menaquinone-9 (MK-9).

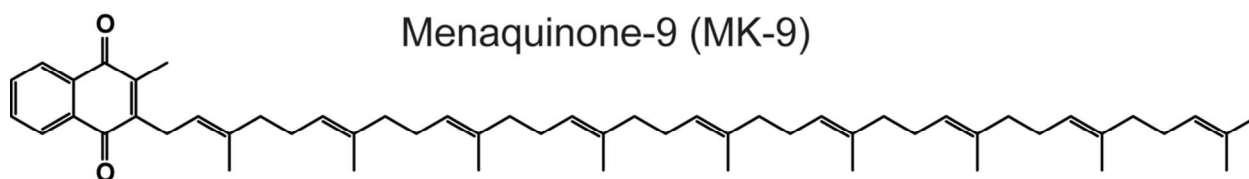

**FIGURE S8:** Schematic of *M. tuberculosis* electron transport chain and the inhibitors screened against WT *M. tuberculosis* and SMK mutants.

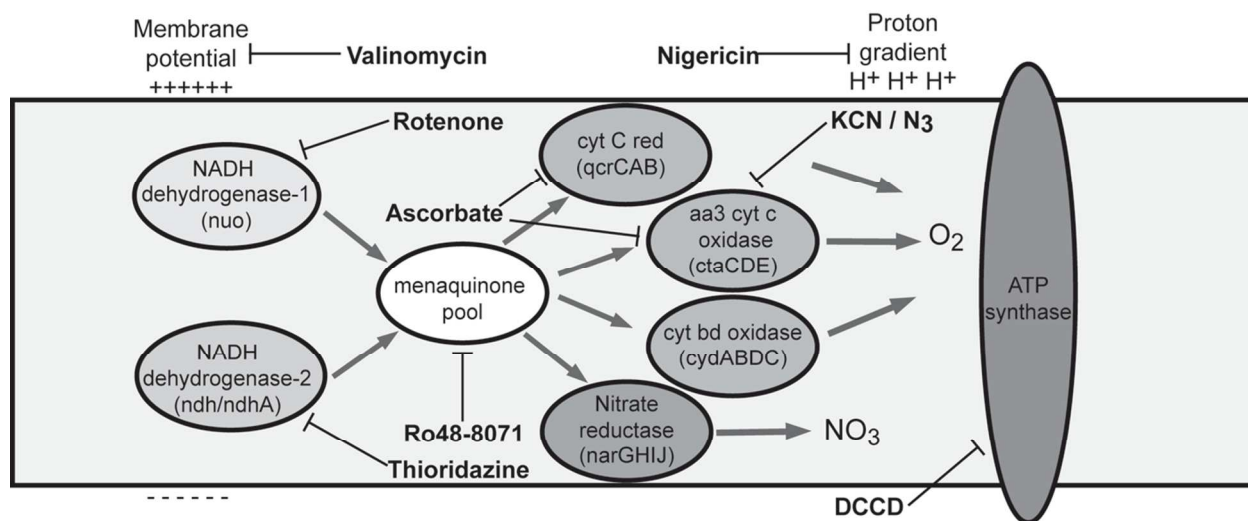

**TABLE S1:** Minimum inhibitory concentrations (MIC<sub>90</sub>) values for WT, SMK mutants and complements.

| Chemical stress               | MIC    | Cell wall inhibitors | MIC        |
|-------------------------------|--------|----------------------|------------|
| H <sub>2</sub> O <sub>2</sub> | 110 mM | INH                  | 0.06 µg/ml |
| NaNO <sub>3</sub> , pH 5.5    | 5 mM   | ETA                  | 5 µM       |
| SDS                           | 0.025% | ETH                  | 6 µM       |

H<sub>2</sub>O<sub>2</sub> hydrogen peroxide; NaNO<sub>3</sub> sodium nitrate, SDS sodium dodecyl sulfate, INH isoniazid, ETA ethionamide, ETH ethambutol.

**TABLE S2:** Strains used in this study

| Strains                                         | Genotype                                                                                                                              | Source           |
|-------------------------------------------------|---------------------------------------------------------------------------------------------------------------------------------------|------------------|
| <b><i>M. smegmatis</i></b>                      |                                                                                                                                       |                  |
| mc <sup>2</sup> 155                             | Wild type                                                                                                                             |                  |
| mc <sup>2</sup> 155 <i>rv2269c</i>              | pKMS101; Kn <sup>r</sup> , contains <i>rv2269c</i>                                                                                    | This study       |
| mc <sup>2</sup> 155 <i>cyp128</i>               | pKMS102; Kn <sup>r</sup> , contains <i>cyp128</i>                                                                                     | This study       |
| mc <sup>2</sup> 155 <i>stf3</i>                 | pKMS103; Kn <sup>r</sup> , contains <i>stf3</i>                                                                                       | This study       |
| mc <sup>2</sup> 155 <i>stf3</i> operon          | pKMS104; Kn <sup>r</sup> , contains <i>rv2269c</i> , <i>cyp128</i> , <i>stf3</i>                                                      | This study       |
| mc <sup>2</sup> 155 <i>cyp128</i> , <i>stf3</i> | pKMS105; Kn <sup>r</sup> , contains <i>cyp128</i> and <i>stf3</i>                                                                     | This study       |
| <b><i>M. tuberculosis</i></b>                   |                                                                                                                                       |                  |
| H37Rv                                           | Wild type                                                                                                                             |                  |
| H37Rv $\Delta$ <i>cyp128</i>                    | Hyg <sup>r</sup> , hyg cassette disrupting <i>cyp128</i>                                                                              | This study       |
| H37Rv $\Delta$ <i>cyp128::cyp128</i>            | Hyg <sup>r</sup> , Kan <sup>r</sup> , complemented strain of $\Delta$ <i>cyp128</i>                                                   | This study       |
| H37Rv $\Delta$ <i>stf3</i>                      | Hyg <sup>r</sup> , <i>stf3</i> interrupted by hyg resistance cassette                                                                 | Ref <sup>1</sup> |
| H37Rv $\Delta$ <i>stf3::stf3</i>                | Hyg <sup>r</sup> , Kan <sup>r</sup> , complement with <i>stf3</i> under the glutamine synthase promoter, modified pMV306 <sup>2</sup> | Ref <sup>1</sup> |
| H37Rv $\Delta$ <i>rv2269c</i>                   | Hyg <sup>r</sup> , <i>hsp60</i> promoter disrupting <i>rv2269c</i>                                                                    | This study       |

**TABLE S3:** Plasmids used in this study

| <b>Reference name</b> | <b>Description</b>                                                                                                                                                               | <b>Source</b>    |
|-----------------------|----------------------------------------------------------------------------------------------------------------------------------------------------------------------------------|------------------|
| pMV261                | Kn <sup>r</sup> , pAL5000 origin, ColE1 origin, multiple cloning site, Phsp60 promoter                                                                                           | Ref <sup>2</sup> |
| pMV306                | Kn <sup>r</sup> , A derivative of pMV261 lacking the Phsp60 promoter                                                                                                             | Ref <sup>2</sup> |
| pKMS101               | pMV261 derivative; contains <i>rv2269c</i>                                                                                                                                       | This study       |
| pKMS102               | pMV261 derivative; contains <i>cyp128</i>                                                                                                                                        | This study       |
| pKMS103               | pMV261 derivative; contains <i>stf3</i>                                                                                                                                          | This study       |
| pKMS104               | pMV261 derivative; contains <i>rv2269c</i> , <i>cyp128</i> , and <i>stf3</i>                                                                                                     | This study       |
| pKMS105               | pMV261 derivative; contains <i>cyp128</i> and <i>stf3</i>                                                                                                                        | This study       |
| pKMS110               | Plasmid used for <i>cyp128</i> disruption with hyg cassette                                                                                                                      | This study       |
| pKMS109               | Plasmid used for <i>rv2269c</i> disruption with hyg cassette                                                                                                                     | This study       |
| pKMS133               | Kn <sup>r</sup> , a derivative of pMV306 encoding <i>cyp128</i> with <i>rv2269c</i> promoter.                                                                                    | This study       |
| pKMS130               | Kn <sup>r</sup> , a derivative of pMV306 encoding <i>cyp128</i> with P <sub>nat</sub> (upstream 1 kb of the first gene in the putative operon) + <i>rv2269c</i> as the promoter. | This study       |
| pKMS118               | Kn <sup>r</sup> , a derivative of pMV306 encoding <i>cyp128</i> with P <sub>nat</sub> .                                                                                          | This study       |



**TABLE S4:** Primers used in this study. Restriction enzymes sequences are in bold and enzyme in parentheses.

| <b>Primer name</b> | <b>Sequence</b>                               | <b>Description</b>                  |
|--------------------|-----------------------------------------------|-------------------------------------|
| okms102            | cacttcgcaat <b>ggcca</b> acgatgcgcgacccttagcg | 5' pKMS101, pKMS104 (MscI )         |
| okms109            | actgttctacgcctctctga <b>atcgat</b> agggtcatga | 3' pKMS101 (ClaI)                   |
| okms100            | ccagcgtcagaaacaatgtg                          | 5' pKMS102, pKMS105                 |
| okms101            | cgtgacaacgggctgcttag                          | 3' pKMS102                          |
| okms103            | cacttcgcaat <b>ggcca</b> acgatgcgcgacccttagcg | 5' pKMS103 (MscI)                   |
| okms112            | actgttctacgcctctctga <b>atcgat</b> gtcg       | 3' pKMS103, pKMS104, pKMS105 (ClaI) |
| okms126            | ccgtacgt <b>ctcgagg</b> tgagcaactgaccg        | pKMS110 KO 5' cyp128 (XhoI)         |
| okms127            | caccatga <b>agctt</b> ggctcagaccaacgctcgggc   | pKMS110 KO 5' cyp128 (HindIII)      |
| okms128            | ccg <b>ggta</b> ccgaatagagggtggtcgagc         | pKMS110 KO 3' cyp128 (KpnI)         |
| okms129            | cggtact <b>taag</b> cgaacgctcgggtgtg          | pKMS110 KO 3' cyp128 (AflII)        |
| okms213            | cg <b>ggta</b> ccgtggccaacgatgcgcg            | 5' pKMS133 (KpnI)                   |
| okms196            | gtcgacat <b>cgat</b> gcacggcgaagcggttac       | 3' pKMS133 (ClaI)                   |
| okms179            | <b>ttc</b> gaaatgaccgcgacacagtccc             | 5' pKMS118 (BstBI)                  |
| okms180            | gacat <b>cgatt</b> gcgcggtcagaccaac           | 3' pKMS118 cyp128 (ClaI)            |
| okms181            | gc <b>ggta</b> ccgtggcttgccatgtcgttatgag      | 5' pKMS130 (KpnI)                   |
| okms196            | gtcgacat <b>cgat</b> gcacggcgaagcggttac       | 3' pKMS130 (ClaI)                   |
| okms122            | gtacgt <b>ctcgag</b> tgttaggccctcggccagcg     | pKMS109 KO 5' rv2269 (XhoI)         |
| okms123            | gatccagat <b>at</b> caactgggcccgactgtgtagg    | pKMS109 KO 5' rv2269 (EcoRV)        |
| okms124            | gacaggact <b>ctaga</b> cgcgaattattgcatgcccg   | pKMS109 KO 3' rv2269 (XbaI)         |
| okms125            | gactagag <b>ggta</b> ccagcagtgctctcatag       | pKMS109 KO 3' rv2269 (KpnI)         |

**References:**

- (1) Mougous, J. D.; Senaratne, R. H.; Petzold, C. J.; Jain, M.; Lee, D. H.; Schelle, M. W.; Leavell, M. D.; Cox, J. S.; Leary, J. A.; Riley, L. W.; et al. A sulfated metabolite produced by *stf3* negatively regulates the virulence of *Mycobacterium tuberculosis*. *Proc. Natl. Acad. Sci. U.S.A.* **2006**, *103* (11), 4258–4263 DOI: 10.1073/pnas.0510861103.
- (2) Stover, C. K.; la Cruz, de, V. F.; Fuerst, T. R.; Burlein, J. E.; Benson, L. A.; Bennett, L. T.; Bansal, G. P.; Young, J. F.; Lee, M. H.; Hatfull, G. F. New use of BCG for recombinant vaccines. *Nature* **1991**, *351* (6326), 456–460 DOI: 10.1038/351456a0.
